# Supplementary material for: L-5F, an apolipoprotein A-I mimetic, inhibits tumor angiogenesis by suppressing VEGF/basic FGF signaling pathways
Source: Royal Society of Chemistry journal article supplement (doi:10.1039/c0ib00147c), 2011-01-01

*Supplemental Figure 1. L-4F inhibits tumor angiogenesis in vivo.* Flank tumors were established in wild-type C57BL6/J mice as described under Materials and Methods. After 2 weeks, mice were treated with L-4F (10 mg kg<sup>-1</sup>, s.c., daily injection) or the corresponding scrambled peptide (SP) for 3 weeks. Then, mice were sacrificed and tumor tissues were collected and subjected to IHC staining. **TOP**, IHC staining of tumor tissues. H & E, tissues were stained with hematoxylin and eosin to define tissue morphology. CD31, Immunostaining was performed with anti-CD31 for detection of endothelial cells in microvessels. **BOTTOM**. Quantitative analysis of vessel number in each tumor tissue section. Vessel number was quantified by manual counting, and area of each tissue section was measured by usage of software 'Image J'. *N* = 4 for each group. #, *p* < 0.05, compared to the corresponding SP-treated group.

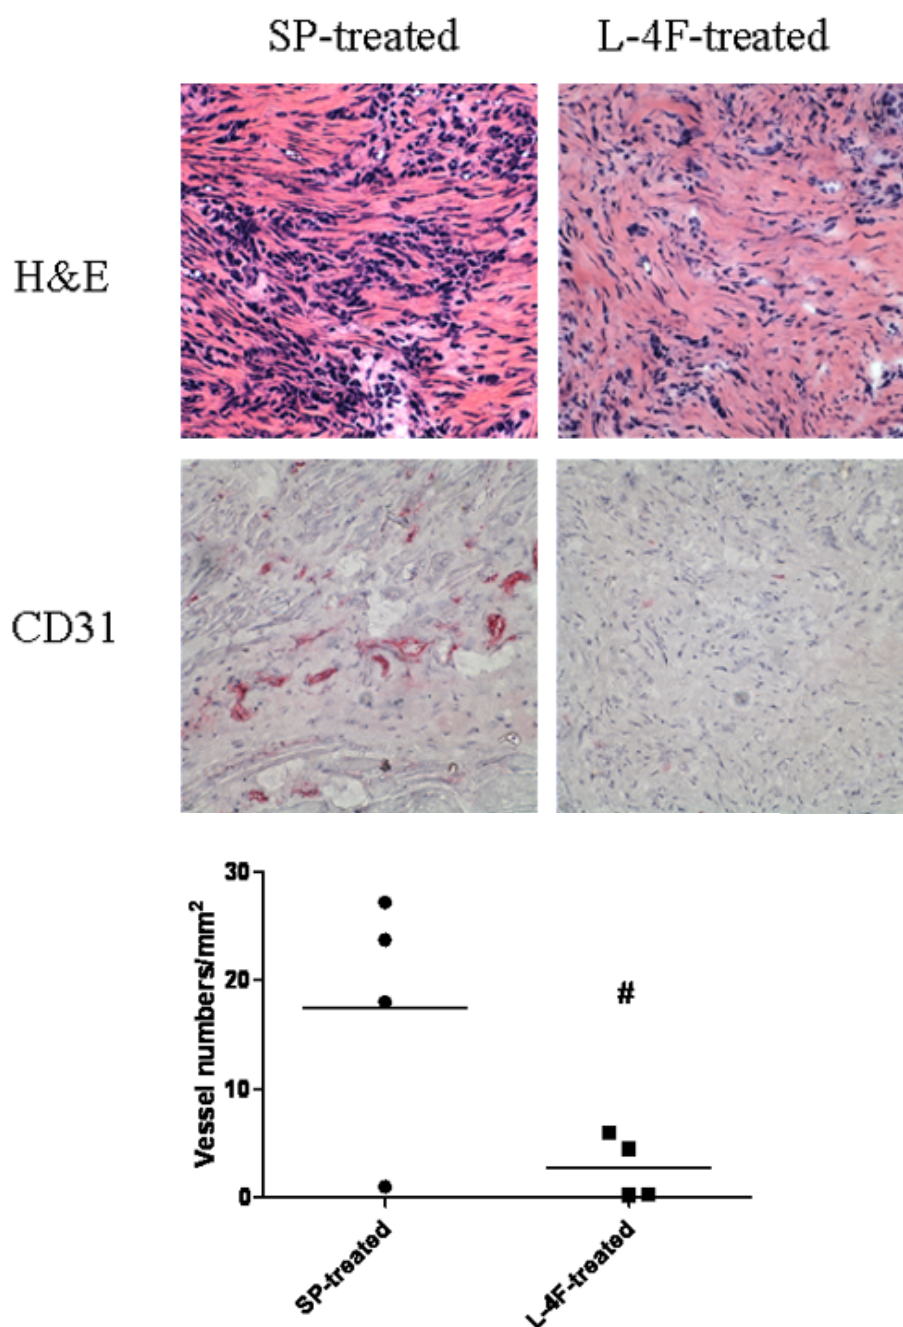

Supplement: c0ib00147c.pdf [file c0ib00147c.pdf]
